# Supplementary material for: A novel POLE mutation associated with cancers of colon, pancreas, ovaries and small intestine
Source: PubMed Central journal article supplement (PMC4559173; doi:10.1007/s10689-015-9803-2), 2015-04-10
Supplement: 10689_2015_9803_MOESM2_ESM.pdf [file 10689_2015_9803_MOESM2_ESM.pdf]

**Online Resource 3:** List of genes included in the endocrine tumour panel

Journal: Familial Cancer

Title: A Novel POLE Mutation Associated with Cancers of Colon, Pancreas, Ovaries and Small Intestine

Authors: Maren F. Hansen, Jostein Johansen, Inga Bjørnevoll, Anna E. Sylvander, Kristin S. Steinsbekk, Pål Sætrom, Arne K. Sandvik, Finn Drabløs, Wenche Sjursen.

Corresponding author:

Maren F. Hansen

Department of Laboratory Medicine, Children's and Women's Health, Faculty of Medicine,  
Norwegian University of Science and Technology, 7491 Trondheim, Norway.

Department of Pathology and Medical Genetics, St. Olavs Hospital, Trondheim University Hospital,  
7006 Trondheim, Norway

[maren.hansen@ntnu.no](mailto:maren.hansen@ntnu.no) or [maren.hansen@stolav.no](mailto:maren.hansen@stolav.no)

CDC73

CDKN2A

ALK

DICER1

BAP1

PALB2

FH

KIF1B

MAX

MEN1

MEN2

NF1

NF2

MET

PHOX2B

PTCH1

RAD51C

RET

RB1

SMARC1

TMEM127

TSC1

TSC2

VHL

SDHA

SDHAF2

SDHB

SDHC

SDHD
