# Supplementary material for: A novel POLE mutation associated with cancers of colon, pancreas, ovaries and small intestine
Source: PubMed Central journal article supplement (PMC4559173; doi:10.1007/s10689-015-9803-2), 2015-04-10
Supplement: 10689_2015_9803_MOESM3_ESM.pdf [file 10689_2015_9803_MOESM3_ESM.pdf]

**Online Resource 1:** Table with overview of the sequenced individuals with regard to phenotype, *POLE* mutation carrier status, sequence methods used and which filtering strategy they were included in.

**Journal:** Familial Cancer

**Title:** A Novel *POLE* Mutation Associated with Cancers of Colon, Pancreas, Ovaries and Small Intestine

**Authors:** Maren F. Hansen, Jostein Johansen, Inga Bjørnevoll, Anna E. Sylvander, Kristin S. Steinsbekk, Pål Sætrom, Arne K. Sandvik, Finn Drabløs, Wenche Sjursen.

**Corresponding author:**

Maren F. Hansen

Department of Laboratory Medicine, Children's and Women's Health, Faculty of Medicine, Norwegian University of Science and Technology, 7491 Trondheim, Norway.

Department of Pathology and Medical Genetics, St. Olavs Hospital, Trondheim University Hospital, 7006 Trondheim, Norway

[maren.hansen@ntnu.no](mailto:maren.hansen@ntnu.no) or [maren.hansen@stolav.no](mailto:maren.hansen@stolav.no)

| ID     | Phenotype                                                              | <i>POLE</i><br>p.Tyr458Phe<br>carrier | Exome seq/avg<br>coverage/<br>%covered target <sup>1</sup> | Validated by<br>Sanger | Classified as<br>affected/unaffected<br>for filtering | Used in filtering<br>based on<br>disease status | Used in<br>filtering based<br>on CRC gene<br>panel |
|--------|------------------------------------------------------------------------|---------------------------------------|------------------------------------------------------------|------------------------|-------------------------------------------------------|-------------------------------------------------|----------------------------------------------------|
| III:2  | CRC 63 y.                                                              | Yes                                   | No/-/-                                                     | Yes                    | -                                                     | -                                               | -                                                  |
| III:16 | No cancers                                                             | No                                    | Yes/97/96                                                  | Yes                    | Unaffected                                            | Yes                                             | Yes                                                |
| IV:3   | Lung cancer 72 y.                                                      | No                                    | Yes/126/98                                                 | Yes                    | Unclassified                                          | No                                              | Yes                                                |
| IV:6   | Prostate cancer 59 y                                                   | No                                    | No/-/-                                                     | Yes                    | -                                                     | -                                               | -                                                  |
| IV:8   | Pancreatic cancer 46 y.                                                | Yes                                   | No/-/-                                                     | Yes                    | -                                                     | -                                               | -                                                  |
| IV:9   | Bil. Ovarian cancer 40<br>y. CRC 48 y, Mult.<br>adenomas               | Yes                                   | Yes/220/99                                                 | Yes                    | Affected                                              | Yes                                             | Yes                                                |
| IV:10  | Mult. adenomas                                                         | Yes                                   | Yes/165/99                                                 | Yes                    | Affected                                              | Yes                                             | Yes                                                |
| IV:12  | Bladder cancer 54 y.                                                   | No                                    | Yes/242/99                                                 | Yes                    | Unclassified                                          | No                                              | Yes                                                |
| IV:13  | CRC 43 y., Mult.<br>adenomas                                           | Yes                                   | No/-/-                                                     | Yes                    | -                                                     | -                                               | -                                                  |
| IV:15  | CRC 58 y                                                               | Yes                                   | No/-/-                                                     | Yes                    | -                                                     | -                                               | -                                                  |
| IV:17  | CRC 42 y, small<br>intestine cancer 54<br>and 57 y., mult.<br>adenomas | Yes                                   | Yes/155/99                                                 | Yes                    | Affected                                              | Yes                                             | Yes                                                |
| IV:20  | CRC 38 y.                                                              | Yes                                   | No/-/-                                                     | Yes                    | -                                                     | -                                               | -                                                  |
| IV:21  | CRC 56 y., adenomas                                                    | Yes                                   | Yes/112/97                                                 | Yes                    | Unclassified                                          | No                                              | Yes                                                |
| V:2    | Adenoma                                                                | No                                    | Yes/235/99                                                 | Yes                    | Unclassified                                          | No                                              | Yes                                                |
| V:4    | Mult. adenomas                                                         | Yes                                   | Yes/157/98                                                 | Yes                    | Affected                                              | Yes                                             | Yes                                                |
| V:5    | Mult. adenomas                                                         | Yes                                   | Yes/187/99                                                 | Yes                    | Affected                                              | Yes                                             | Yes                                                |
| V:7    | Rectal neuroendocrine<br>tumour 34 y.,<br>adenomas.                    | No                                    | Yes/117/98                                                 | Yes                    | Affected                                              | Yes                                             | Yes                                                |
| V:8    | Adenomas                                                               | Yes                                   | Yes/81/95                                                  | Yes                    | Affected                                              | Yes                                             | Yes                                                |
| V:9    | -                                                                      | No                                    | Yes/159/99                                                 | Yes                    | Unclassified                                          | Yes                                             | Yes                                                |
| V:10   | -                                                                      | No                                    | Yes/68/93                                                  | Yes                    | Unclassified                                          | Yes                                             | Yes                                                |

<sup>1</sup>estimated as the percentage of target regions with an average coverage of at least 20x. The percentage of bases within target regions with a coverage of at least 20x is similar, between 91 and 99%.
