# Supplementary material for: A novel POLE mutation associated with cancers of colon, pancreas, ovaries and small intestine
Source: Springer Nature journal article supplement (doi:10.1007/s10689-015-9803-2), 2015-04-09
Supplement: MOESM1 [file 8887588]

**Online Resource 2:** List of genes included in the CRC gene panel

**Journal:** Familial Cancer

**Title:** A Novel POLE Mutation Associated with Cancers of Colon, Pancreas, Ovaries and Small Intestine

**Authors:** Maren F. Hansen, Jostein Johansen, Inga Bjørnevoll, Anna E. Sylvander, Kristin S. Steinsbekk, Pål Sætrom, Arne K. Sandvik, Finn Drabløs, Wenche Sjursen.

**Corresponding author:**

Maren F. Hansen

Department of Laboratory Medicine, Children's and Women's Health, Faculty of Medicine,  
Norwegian University of Science and Technology, 7491 Trondheim, Norway.

Department of Pathology and Medical Genetics, St. Olavs Hospital, Trondheim University Hospital,  
7006 Trondheim, Norway

[maren.hansen@ntnu.no](mailto:maren.hansen@ntnu.no) or [maren.hansen@stolav.no](mailto:maren.hansen@stolav.no)

ACVRL1  
AKR1C4  
AKT1  
APC  
ATM  
AURKA  
AXIN1  
AXIN2  
BAX  
BCLAF1  
BGLAP  
BLM  
BMP2  
BMP4  
BMPR1A  
BRCA1  
BRCA2  
BUB1  
BUB1B  
BUB3  
CCDC18  
CCND1  
CCND2  
CDH1  
CDKN1A  
CENPE  
CHEK2

CTNNB1

DCC

DCLRE1A

DSG4

DUSP10

DUSP4

EIF3C

EIF3H

ENG

EPCAM

EPHB2

EXO1

FAM166A

FANCD2

FANCM

FLCN

GALNT12

GREM1

HAQ1

HELQ

KIF23

KIT

KLLN

LAMA3

LAMA5

LAMB4

LAMC1

LAMC3

LUC7L

MAML3

MCC

MLH1

MLH3

MRPL3

MSH2

MSH3

MSH6

MUTYH

MYC

MYH11

NABP1

NOTCH3

NUDT7

OGG1

PICALM

PIK3CA

PITX1

PLA2G2A

PMS1

PMS2

PMS2CL

POLD

POLD3

POLE

PPP1CB  
PRADC1  
PRSS37  
PSPH  
PTCHD3  
PTEN  
PTPRJ  
RAI1  
RHNP2  
SFXN4  
SHROOM2  
SLC5A9  
SMAD4  
SMAD7  
STK11  
TBX3  
TERC  
TERT  
TGFB2  
TKT  
TLR2  
TLR4  
TP53  
TRA2A  
TREX2  
TWSG1  
UACA

UBAP2

USP6NL

ZFP14

ZMYM5

ZNF490
